# Supplementary material
Source: Springer Nature journal article supplement (https://www.springermedizin.de/resource/supplementary/13037_2011_102_MOESM5_ESM.pdf/9659322)
Supplement: MOESM5 [file 9659322]

## Surgery and Research reconcilable through:

- Early enthusiasm of the young
- Synchronised training in clinic and research
- Adequate clinical recognition
- Adequate financial compensation
- Patient-based, sustained research
- Stable „Work-Life Balance“
- Possibility to articulate criticism and self-criticism in clinic and research
- Creation of more independent chairs in surgical research
